# Supplementary material
Source: publisher figshare collection journal article supplement (https://karger.figshare.com/ndownloader/files/13112600)
Supplement: Supplementary file 1 [file 13112600]

**Supplement Table A Key stroke service demographics**

| **Hospital setting** | **AUS**  **(N=63)** | **UK**  **(N=93)** | **USA**  **(N=229)** |
| --- | --- | --- | --- |
|  | **n (%)** | | |
| Tertiary | 29 (46) | 49 (53) | 66 (29) |
| Non-tertiary | 30 (48) | 43 (46) | 152 (66) |
| Private | 4 (6.4) | 0 | 0 |
| Not Reported | 0 | 1 (1) | 11 (5) |
| **Stroke service** |  |  |  |
| Comprehensive | 24 (38) | Not Collected | 157 (69) |
| Primary | 31 (49) | Not Collected | 64 (28) |
| General hospital | 8 (13) | Not Collected | 3 (1) |
| Not Reported | 0 | Not Collected | 5 (2) |
| **Level of telemedicine use** |  |  |  |
| Always | 2 (3.2) | 6 (6.5) | Not Collected |
| Often | 8 (13) | 17 (18) | Not Collected |
| Sometimes | 9 (14) | 33 (35.5) | Not Collected |
| Never | 43 (68) | 36 (39) | Not Collected |
| Unknown | 1 (1.6) | 0 | Not Collected |
| Not Reported | 0 | 1 (1) | Not Collected |
| **rt-PA protocol** |  |  |  |
| Yes | 62 (98) | 92 (99) | NA* |
| No | 1 (1.6) | 0 (0.0) | NA* |
| Not Reported | 0 | 1 (1) | NA* |

*rt-PA protocols were required to participate in the survey.

**Supplement Table B** **Associations between service related factors and rtPA treatment rates**

|  | **AUS** | | | **UK** | | | **USA** | | |
| --- | --- | --- | --- | --- | --- | --- | --- | --- | --- |
| **Mean (SD)** | **p-value** | **n** | **Mean (SD)** | **p-value** | **n** | **Mean (SD)** | **p-value** | **N** |
| **Hospital Setting1**  Non-Tertiary  Tertiary | 7.62 (5.22)  9.95 (6.22) | 0.120 | 31  29 | 11.52 (4.77)  13.69 (4.52) | 0.046 | 36  41 | 7.94 (5.72)  10.97 (7.68) | 0.005 | 135  48 |
| **Average door to needle time2**  <45mins  46-59mins  ≥60mins | 15.68 (9.21)  9.79 (6.21)  8.85 (5.09) | 0.131 | 3  9  37 | 14.88 (6.18)  13.99 (4.00)  11.90 (3.14) | 0.067 | 20  18  28 | 16.51 (7.35)  10.75 (7.68)  8.07 (5.89) | <0.001 | 7  24  151 |

1 Independent Sample t-test, 2 One-way ANOVA

**Supplement Table C** **Factors associated with the addition of non-standard criteria**

|  | **AUS**  **N=49** | | **UK**  **N=68** | | **USA**  **N=184** | |
| --- | --- | --- | --- | --- | --- | --- |
| **Variables entered in regression model** | **Coefficients** | **p-value** | **Coefficients** | **p-value** | **Coefficients** | **p-value** |
| Hospital Setting | -0.29 (-2.84, 2.25) | 0.817 | -0.83 (-2.39,0.72) | 0.287 | -1.72(-3.25, -0.20) | 0.03 |
| Service | 0.06 (-2.35, 2.48) | 0.958 | NA |  | -0.28(-1.68, 1.10) | 0.684 |
| Admission volume | -0.00 ( -0.01, 0.01) | 0.983 | -0.01(-0.04,0.00) | 0.434 | 0.00 (-0.00, 0.00) | 0.187 |
| Average door to needle time (46mins to 59mins) | -1.33(-5.52, 2.86) | 0.525 | 1.13(-0.86,3.12) | 0.262 | 2.51(-1.05, 6.07) | 0.165 |
| Average door to needle time (>60mins) | 0.60 (-3.34-4.54) | 0.760 | 1.19(-0.67,3.05) | 0.207 | 3.57 (0.38 ,6.75) | 0.023 |
| Adherence to 3 hours | NA |  | NA |  | -2.44(-4.30, -0.60) | 0.01 |
